# Supplementary material for: Predictors of Intervention Success in a Sports-Based Program for Adolescents at Risk of Juvenile Delinquency
Source: PubMed Central journal article supplement — Int J Offender Ther Comp Criminol. 2017 Mar 8;62(6):1535–55. doi: 10.1177/0306624X17698055 (PMC5904749; doi:10.1177/0306624x17698055), 2017-03-08
Supplement: Spruit_Predictors_intervention_success_AJB_Supplement.pdf [file Spruit_Predictors_intervention_success_AJB_Supplement.pdf]

## Appendix A.

Table 1.

*Shortened versions of the Socio-moral Atmosphere at the Sporting Environment and Quality of the Relationship scales*

|                                                              | Factor loadings |
|--------------------------------------------------------------|-----------------|
| Socio-moral Atmosphere at the Sporting Environment           |                 |
| 1. At this club the athletes trust each other                | .752            |
| 2. At this club the coaches are willing to help athletes     | .726            |
| 3. At this club the athletes treat each other fairly         | .715            |
| 4. At this club the coaches treat the athletes fairly        | .715            |
| 5. At this club the coaches are interested in their athletes | .692            |
| Quality of the Relationship                                  |                 |
| 1. I trust this coach                                        | .865            |
| 2. I feel comfortable with this coach                        | .860            |
| 3. I think this is a great coach                             | .818            |
| 4. I appreciate this coach                                   | .795            |
| 5. I put in an effort for this coach                         | .700            |
